# Supplementary material for: Objective Quantification of Bilateral Bubble Contrast Echocardiography Correlates with Systemic Oxygenation in Patients with Single Ventricle Circulation
Source: MDPI journal article supplement (doi:10.3390/jcdd11030084), 2024-03-01
Supplement: s1 [file s1]

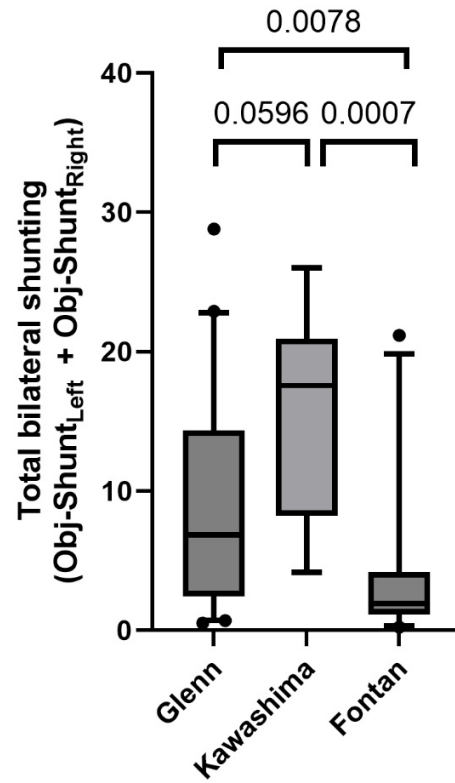

Supplemental Figure S1. Comparison of total bilateral intrapulmonary shunting among patients at different stages of single ventricle circulation. Graph demonstrates a box-and-whisker plot with median and interquartile ranges (box), as well as 5<sup>th</sup>-95<sup>th</sup> percentiles (whiskers) and single points outside the 5<sup>th</sup>-95<sup>th</sup> percentiles. Analyzed using Kruskal Wallis test with Dwass, Steel, Critchlow-Fligner method for multiple comparison adjustment.
